# Supplementary material
Source: Springer Nature journal article supplement (https://www.springermedizin.de/resource/supplementary/12875_2011_562_MOESM1_ESM.pdf/9434946)
Supplement: MOESM1 [file 9434946]

## **MODULE 1**

- Overall concept of Palliative Care
- National Palliative Care Plan
- Biopsychosocial model.  
Comprehensive patient assessment
- Assessment and treatment of pain.  
Opioid management

## **MODULE 2**

- Asthenia and anorexia Management
- Gastrointestinal symptoms in palliative care patients
- Hydration in terminal patients

## **MODULE 3**

- Management of respiratory symptoms
- Neuropsychiatric symptoms: anxiety, depression, delirium
- Urinary symptoms
- Management and prevention of pressure ulcers
- Palliative care considerations for non-malignant conditions

## **MODULE 4**

- Anthropology of death
- Communication. How to give bad news. Information in difficult situations
- Care during agony and palliative sedation
- Ethical considerations in palliative care
- Instruments to measure quality of life in oncology patients, validated in Spanish
- Final clinical cases
